# Supplementary material
Source: PubMed Central journal article supplement (PMC341919)

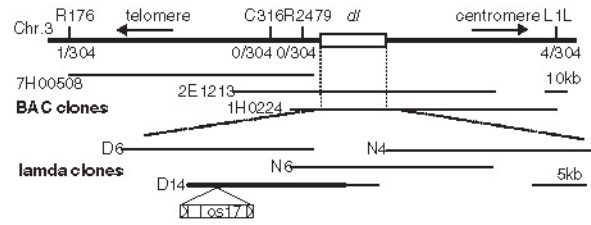

Supplemental Figure 1

Supplement: plntcell_tpc.018044_1.pdf [file plntcell_tpc.018044_1.pdf]

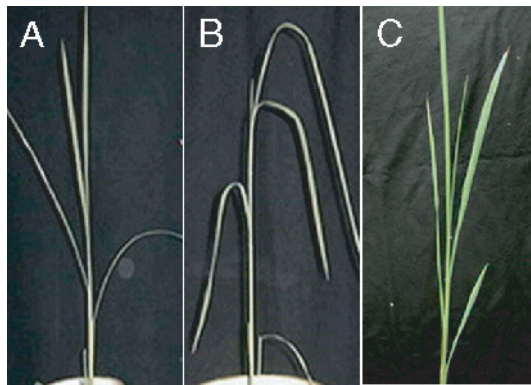

Supplemental Figure 2

Supplement: plntcell_tpc.018044_2.pdf [file plntcell_tpc.018044_2.pdf]
